# Supplementary material for: Comparison of array-based comparative genomic hybridization with gene expression-based regional expression biases to identify genetic abnormalities in hepatocellular carcinoma
Source: PubMed Central journal article supplement (PMC1134655; doi:10.1186/1471-2164-6-67), 2005-05-09

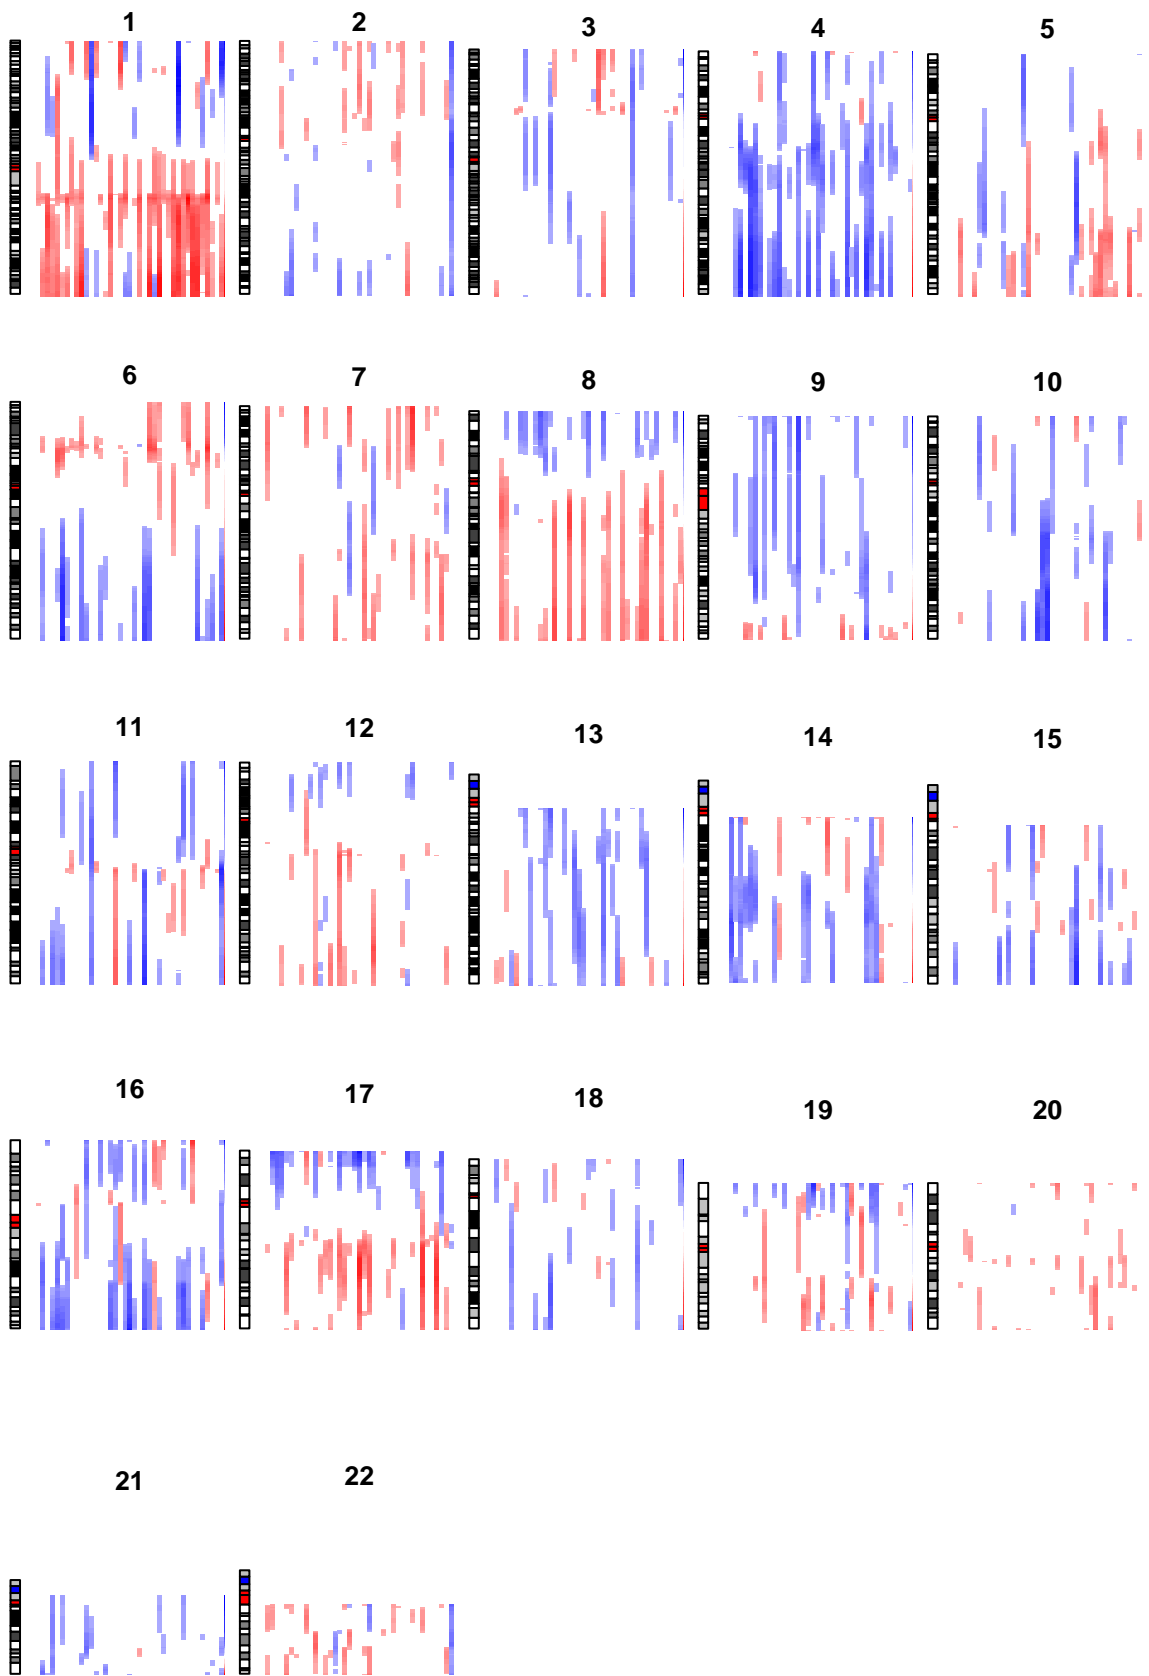

Supplement: 1471-2164-6-67-S1.pdf [file 1471-2164-6-67-S1.pdf]
